# Supplementary material for: A low Smc flux avoids collisions and facilitates chromosome organization in Bacillus subtilis
Source: eLife. 2021 Aug 4;10:e65467. doi: 10.7554/eLife.65467 (PMC8357415; doi:10.7554/eLife.65467)
Supplement: Supplementary file 4. [file elife-65467-supp4.xlsx]

## Sheet: 3C_seq_experiments
Table listing strains for which 3C-seq maps were generated with reference to the figure panels, genotype and number of valid reads.
Sample name	Figure	Additional info	Genotype	Number of valid reads
BSG1002_3C	1C, 2A (inset)		1A700, smc ftsY::ermB, trpC2	729785
BSG1018_3C	1D		1A700, smc(Streptococcus pneumoniae hinge) ftsY::ermB, trpC2	458254
BSG2090_3C	1-S1D		1A700, smc(1-438, 487-684, 733-1186) ftsY::ermB, trpC2	866761
BSG2092_3C	1-S1D		1A700, smc(1-399, 487-684, 772-1186) ftsY::ermB, trpC2	807671
BSG2093_3C	1C		1A700, smc(1-395, 487-684, 776-1186) ftsY::ermB, trpC2	613329
BSG2093_3C_rep		_rep	1A700, smc(1-395, 487-684, 776-1186) ftsY::ermB, trpC2	741071
BSG2352_3C	1D		1A700, smc(1-395, SpnSmc(398-768), 776-1186) ftsY::ermB, trpC2	790582
BSG2934_rif_3C	1-S2E		PY79: Δ7-parS, parAB::kanR	878609
BSG2934_rif_ctrl_3C	1-S2E		PY79: Δ7-parS, parAB::kanR	784908
BSG3026_t0_3C	2D		PY79: Δ7-parS(parS359+), ΔparB::kanR, amyE::(PhbsB short 5'UTR-theo E+ -parB (mtparS))::CAT	762249
BSG3026_t20_3C	2D	_reseq	PY79: Δ7-parS(parS359+), ΔparB::kanR, amyE::(PhbsB short 5'UTR-theo E+ -parB (mtparS))::CAT	4.08852e+06
BSG3026_t30_3C	2D	_reseq	PY79: Δ7-parS(parS359+), ΔparB::kanR, amyE::(PhbsB short 5'UTR-theo E+ -parB (mtparS))::CAT	3.98738e+06
BSG3026_t40_3C	2D	_reseq	PY79: Δ7-parS(parS359+), ΔparB::kanR, amyE::(PhbsB short 5'UTR-theo E+ -parB (mtparS))::CAT	4.06368e+06
BSG3026_t60_3C	2D	_reseq	PY79: Δ7-parS(parS359+), ΔparB::kanR, amyE::(PhbsB short 5'UTR-theo E+ -parB (mtparS))::CAT	3.19725e+06
BSG3216_t0_3C	2D	_reseq	PY79: Δ7-parS(parS359+), ΔparB::kanR, smc(1-476 SpnSmc(398-768) 695-1186) ftsY::ermB, amyE::(PhbsB short 5'UTR-theo E+ -parB (mtparS))::CAT	4.57337e+06
BSG3216_t20_3C	2D	_reseq	PY79: Δ7-parS(parS359+), ΔparB::kanR, smc(1-476 SpnSmc(398-768) 695-1186) ftsY::ermB, amyE::(PhbsB short 5'UTR-theo E+ -parB (mtparS))::CAT	4.84182e+06
BSG3216_t30_3C	2D	_reseq	PY79: Δ7-parS(parS359+), ΔparB::kanR, smc(1-476 SpnSmc(398-768) 695-1186) ftsY::ermB, amyE::(PhbsB short 5'UTR-theo E+ -parB (mtparS))::CAT	5.14336e+06
BSG3216_t40_3C	2D	_reseq	PY79: Δ7-parS(parS359+), ΔparB::kanR, smc(1-476 SpnSmc(398-768) 695-1186) ftsY::ermB, amyE::(PhbsB short 5'UTR-theo E+ -parB (mtparS))::CAT	4.79411e+06
BSG3216_t60_3C	2D	_reseq	PY79: Δ7-parS(parS359+), ΔparB::kanR, smc(1-476 SpnSmc(398-768) 695-1186) ftsY::ermB, amyE::(PhbsB short 5'UTR-theo E+ -parB (mtparS))::CAT	4.94411e+06
BSG3425_3C	1C, 2A (inset)		1A700, smc(1-488), SpnSmc(398-768), smc(682-1186) ftsY::ermB, trpC2	750583
BSG3426_3C	1C		1A700, smc(1-482), SpnSmc(398-768), smc(689-1186) ftsY::ermB, trpC2	662864
BSG3427_3C	1C		1A700, smc(1-476), SpnSmc(398-768), smc(695-1186) ftsY::ermB, trpC2	772057
BSG3427_3C_rep		_rep	1A700, smc(1-476), SpnSmc(398-768), smc(695-1186) ftsY::ermB, trpC2	826945
BSG3428_3C	1C		1A700, smc(1-472), SpnSmc(398-768), smc(699-1186) ftsY::ermB, trpC2	908187
BSG3636_rif_3C	1-S2E		PY79: Δ7-parS, parAB::specR, smc(1-476 SpnSmc(398-768) 695-1186) ftsY::ermB	884991
BSG3636_rif_ctrl_3C	1-S2E		PY79: Δ7-parS, parAB::specR, smc(1-476 SpnSmc(398-768) 695-1186) ftsY::ermB	929208
BSG3674_3C	1-S2B		1A700, Δ1-parS(mtparS334)	975599
BSG3770_rif_3C	1-S2E		PY79: smc::tet, parAB::kanR	934852
BSG3770_rif_ctrl_3C	1-S2E		PY79: smc::tet, parAB::kanR	780163
BSG3790_3C	1C, 2A (inset)		1A700, Δ7-parS(parS359+), smc::specR	887483
BSG3790_3C_rep	3A	_rep	1A700, Δ7-parS(parS359+), smc::specR	813042
BSG3791_3C	1-S2B		1A700, mtparS334 to parS359	370300
BSG3798_3C	1-S2C		1A700, Δ1-parS(mtparS334), smc(1-476), SpnSmc(398-768), smc(695-1186) ftsY::ermB	891442
BSG3801_3C	1C		1A700, Δ7-parS, smc(1-488), SpnSmc(398-768), smc(682-1186) ftsY::ermB	1.01465e+06
BSG3802_3C	1C		1A700, Δ7-parS, smc(1-482), SpnSmc(398-768), smc(689-1186) ftsY::ermB	937520
BSG3803_3C	1C, 2A (inset)		1A700, Δ7-parS, smc(1-476), SpnSmc(398-768), smc(695-1186) ftsY::ermB	978724
BSG3803_3C_rep		_rep	1A700, Δ7-parS, smc(1-476), SpnSmc(398-768), smc(695-1186) ftsY::ermB	775947
BSG3804_3C	1C		1A700, Δ7-parS, smc(1-472), SpnSmc(398-768), smc(699-1186) ftsY::ermB	978725
BSG3805_3C	3B		1A700, Δ6-parS (mtparS334 to parS359), smc::ermB	973350
BSG3805_3C_rep		_rep	1A700, Δ6-parS (mtparS334 to parS359), smc::ermB	638832
BSG3805_rif_3C	3-S1A		1A700, Δ6-parS (mtparS334 to parS359), smc::ermB	930846
BSG3805_rif_ctrl_3C	3-S1A		1A700, Δ6-parS (mtparS334 to parS359), smc::ermB	925716
BSG3863_rif_3C	1-S2E		PY79: smc(1-476), SpnSmc(398-768), smc(695-1186) ftsY::ermB, parAB::kanR	819637
BSG3863_rif_ctrl_3C	1-S2E		PY79: smc(1-476), SpnSmc(398-768), smc(695-1186) ftsY::ermB, parAB::kanR	755356
BSG3878_3C	1F		1A700, Δ6-parS(parS359+, parS334->359+), smc(1-476), SpnSmc(398-768), smc(695-1186) ftsY::tetR	765343
BSG3878_rif_3C	1-S2E		1A700, Δ6-parS(parS359+, parS334->359+), smc(1-476), SpnSmc(398-768), smc(695-1186) ftsY::tetR	786666
BSG3878_rif_ctrl_3C	1-S2E		1A700, Δ6-parS(parS359+, parS334->359+), smc(1-476), SpnSmc(398-768), smc(695-1186) ftsY::tetR	696136
BSG3879_3C	3A		1A700, Δ7-parS(parS334->359+), parAB::kanR, smc::ermB	874693
BSG3879_3C_rep		_rep	1A700, Δ7-parS(parS334->359+), parAB::kanR, smc::ermB	670132
BSG3882_3C	1F		1A700, Δ7-parS(parS334->359+), parAB(mtparS359)::kanR, smc(1-476), SpnSmc(398-768), smc(695-1186) ftsY::specR	865934
BSG3932_3C	1C		1A700, Δ7-parS(parS359+), smc(1-395, 487-684, 776-1186) ftsY::ermB	656969
BSG4083_3C	3B		1A700, Δ6-parS(parS359+), smc::specR, ΔamyE::parS-359 + tetO qPCR primer seq::cat	671311
BSG4083_3C_rep		_rep	1A700, Δ6-parS(parS359+), smc::specR, ΔamyE::parS-359 + tetO qPCR primer seq::cat	581865
BSG4090_3C	3A		1A700, Δ7-parS, parAB::kanR, smc::specR, ΔamyE::parS-359 + tetO qPCR primer seq::cat	642874
BSG4090_3C_rep		_rep	1A700, Δ7-parS, parAB::kanR, smc::specR, ΔamyE::parS-359 + tetO qPCR primer seq::cat	578869
BSG4091_3C	3B		1A700, Δ6-parS(parS334->359+), parAB::kanR, smc::ermB, ΔamyE::parS-359 + tetO qPCR primer seq::cat	674090
BSG4091_3C_rep		_rep	1A700, Δ6-parS(parS334->359+), parAB::kanR, smc::ermB, ΔamyE::parS-359 + tetO qPCR primer seq::cat	900407
BSG4100_3C	4B		1A700, ΔamyE::smc::CAT, qoxD-specR::scpAB-ywcE, trpC2	618251
BSG4100_3C_rep		_rep	1A700, ΔamyE::smc::CAT, qoxD-specR::scpAB-ywcE, trpC2	581865
BSG4100_rif_3C	4-S1B		1A700, ΔamyE::smc::CAT, qoxD-specR::scpAB-ywcE, trpC2	760316
BSG4100_rif_ctrl_3C	4-S1B		1A700, ΔamyE::smc::CAT, qoxD-specR::scpAB-ywcE, trpC2	800386
BSG4137_3C	4D		1A700, Δ6-parS (mtparS334 to parS359), smc::ermB, ΔamyE::smc::CAT, qoxD-specR::scpAB-ywcE	748881
BSG4137_3C_rep		_rep	1A700, Δ6-parS (mtparS334 to parS359), smc::ermB, ΔamyE::smc::CAT, qoxD-specR::scpAB-ywcE	658141
BSG4137_rif_3C	4-S1B		1A700, Δ6-parS (mtparS334 to parS359), smc::ermB, ΔamyE::smc::CAT, qoxD-specR::scpAB-ywcE	887719
BSG4137_rif_ctrl_3C	4-S1B		1A700, Δ6-parS (mtparS334 to parS359), smc::ermB, ΔamyE::smc::CAT, qoxD-specR::scpAB-ywcE	833861
BSG4143_3C	4C		1A700, Δ7-parS(parS359+), smc::ermB, ΔamyE::smc::CAT, qoxD-specR::scpAB-ywcE	714077
BSG4143_3C_rep		_rep	1A700, Δ7-parS(parS359+), smc::ermB, ΔamyE::smc::CAT, qoxD-specR::scpAB-ywcE	610916
BSG4143_rif_3C	4-S1B		1A700, Δ7-parS(parS359+), smc::ermB, ΔamyE::smc::CAT, qoxD-specR::scpAB-ywcE	764221
BSG4143_rif_ctrl_3C	4-S1B		1A700, Δ7-parS(parS359+), smc::ermB, ΔamyE::smc::CAT, qoxD-specR::scpAB-ywcE	738792
BSG4146_3C	4C		1A700, Δ7-parS(parS334->359+), parAB::kanR, smc::ermB, ΔamyE::smc::CAT, qoxD-specR::scpAB-ywcE	774778
BSG4146_3C_rep		_rep	1A700, Δ7-parS(parS334->359+), parAB::kanR, smc::ermB, ΔamyE::smc::CAT, qoxD-specR::scpAB-ywcE	611428
BSG4152_t0_3C	4-S1E		1A700, Δ7-parS(parS359+), ΔparB::kanR, smc::specR, ΔamyE::(Pspank-optRBS-parB(mtparS)-lacI)::CAT	1.55297e+06
BSG4152_t10_3C	4-S1E	_reseq	1A700, Δ7-parS(parS359+), ΔparB::kanR, smc::specR, ΔamyE::(Pspank-optRBS-parB(mtparS)-lacI)::CAT	746740
BSG4152_t15_3C	4-S1E		1A700, Δ7-parS(parS359+), ΔparB::kanR, smc::specR, ΔamyE::(Pspank-optRBS-parB(mtparS)-lacI)::CAT	2.18711e+06
BSG4152_t20_3C	4-S1E		1A700, Δ7-parS(parS359+), ΔparB::kanR, smc::specR, ΔamyE::(Pspank-optRBS-parB(mtparS)-lacI)::CAT	1.68753e+06
BSG4152_t25_3C	4G, 4-S1E	_reseq	1A700, Δ7-parS(parS359+), ΔparB::kanR, smc::specR, ΔamyE::(Pspank-optRBS-parB(mtparS)-lacI)::CAT	1.37685e+06
BSG4427_t0_3C	4-S1E	_reseq	1A700, Δ6-parS (mtparS334 to parS359), ΔparB::kanR, smc::specR, ΔamyE::(Pspank-optRBS-parB(mtparS)-lacI)::CAT	1.50566e+06
BSG4427_t10_3C	4-S1E	_reseq	1A700, Δ6-parS (mtparS334 to parS359), ΔparB::kanR, smc::specR, ΔamyE::(Pspank-optRBS-parB(mtparS)-lacI)::CAT	1.26157e+06
BSG4427_t15_3C	4-S1E	_reseq	1A700, Δ6-parS (mtparS334 to parS359), ΔparB::kanR, smc::specR, ΔamyE::(Pspank-optRBS-parB(mtparS)-lacI)::CAT	1.41875e+06
BSG4427_t20_3C	4-S1E	_reseq	1A700, Δ6-parS (mtparS334 to parS359), ΔparB::kanR, smc::specR, ΔamyE::(Pspank-optRBS-parB(mtparS)-lacI)::CAT	1.61389e+06
BSG4427_t25_3C	4G, 4-S1E	_reseq	1A700, Δ6-parS (mtparS334 to parS359), ΔparB::kanR, smc::specR, ΔamyE::(Pspank-optRBS-parB(mtparS)-lacI)::CAT	1.14662e+06
